# Supplementary material
Source: publisher figshare collection journal article supplement (https://acs.figshare.com/ndownloader/files/4756990)
Supplement: Supplementary file 1 [file 4756990]

## # Supporting information

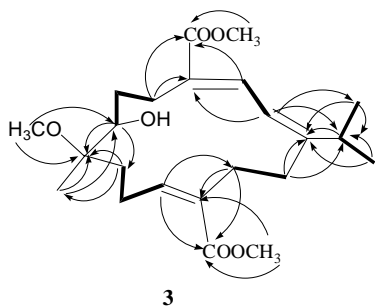

**Figure 3.**  $^1\text{H}$ - $^1\text{H}$  COSY correlations (bold lines) and key HMBC correlations (arrows) of compound **3**.

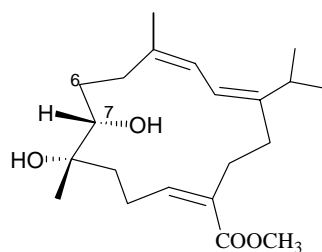

**Figure 4.** Model compound **7**  $J_{\text{H-7,6}} = 10.8, 3.7$  Hz.

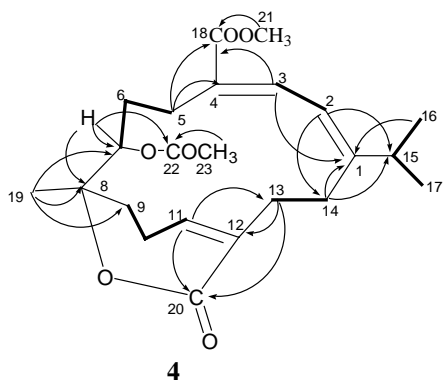

**Figure 6.**  $^1\text{H}$ - $^1\text{H}$  COSY correlations (bold lines) and key HMBC correlations (arrows) of compound **4**.

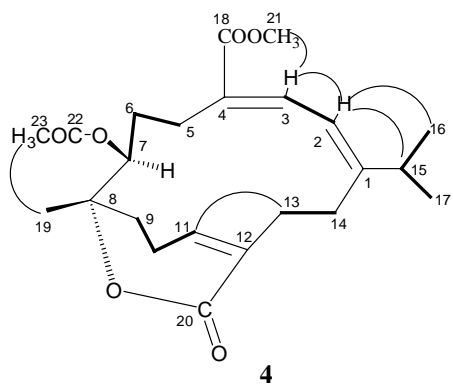

**Figure 7.** NOE interactions of compound **4**.
